# Supplementary material
Source: publisher figshare collection journal article supplement (https://geolsoc.figshare.com/ndownloader/files/10350819)
Supplement: Supplementary file 1 [file 10350819]

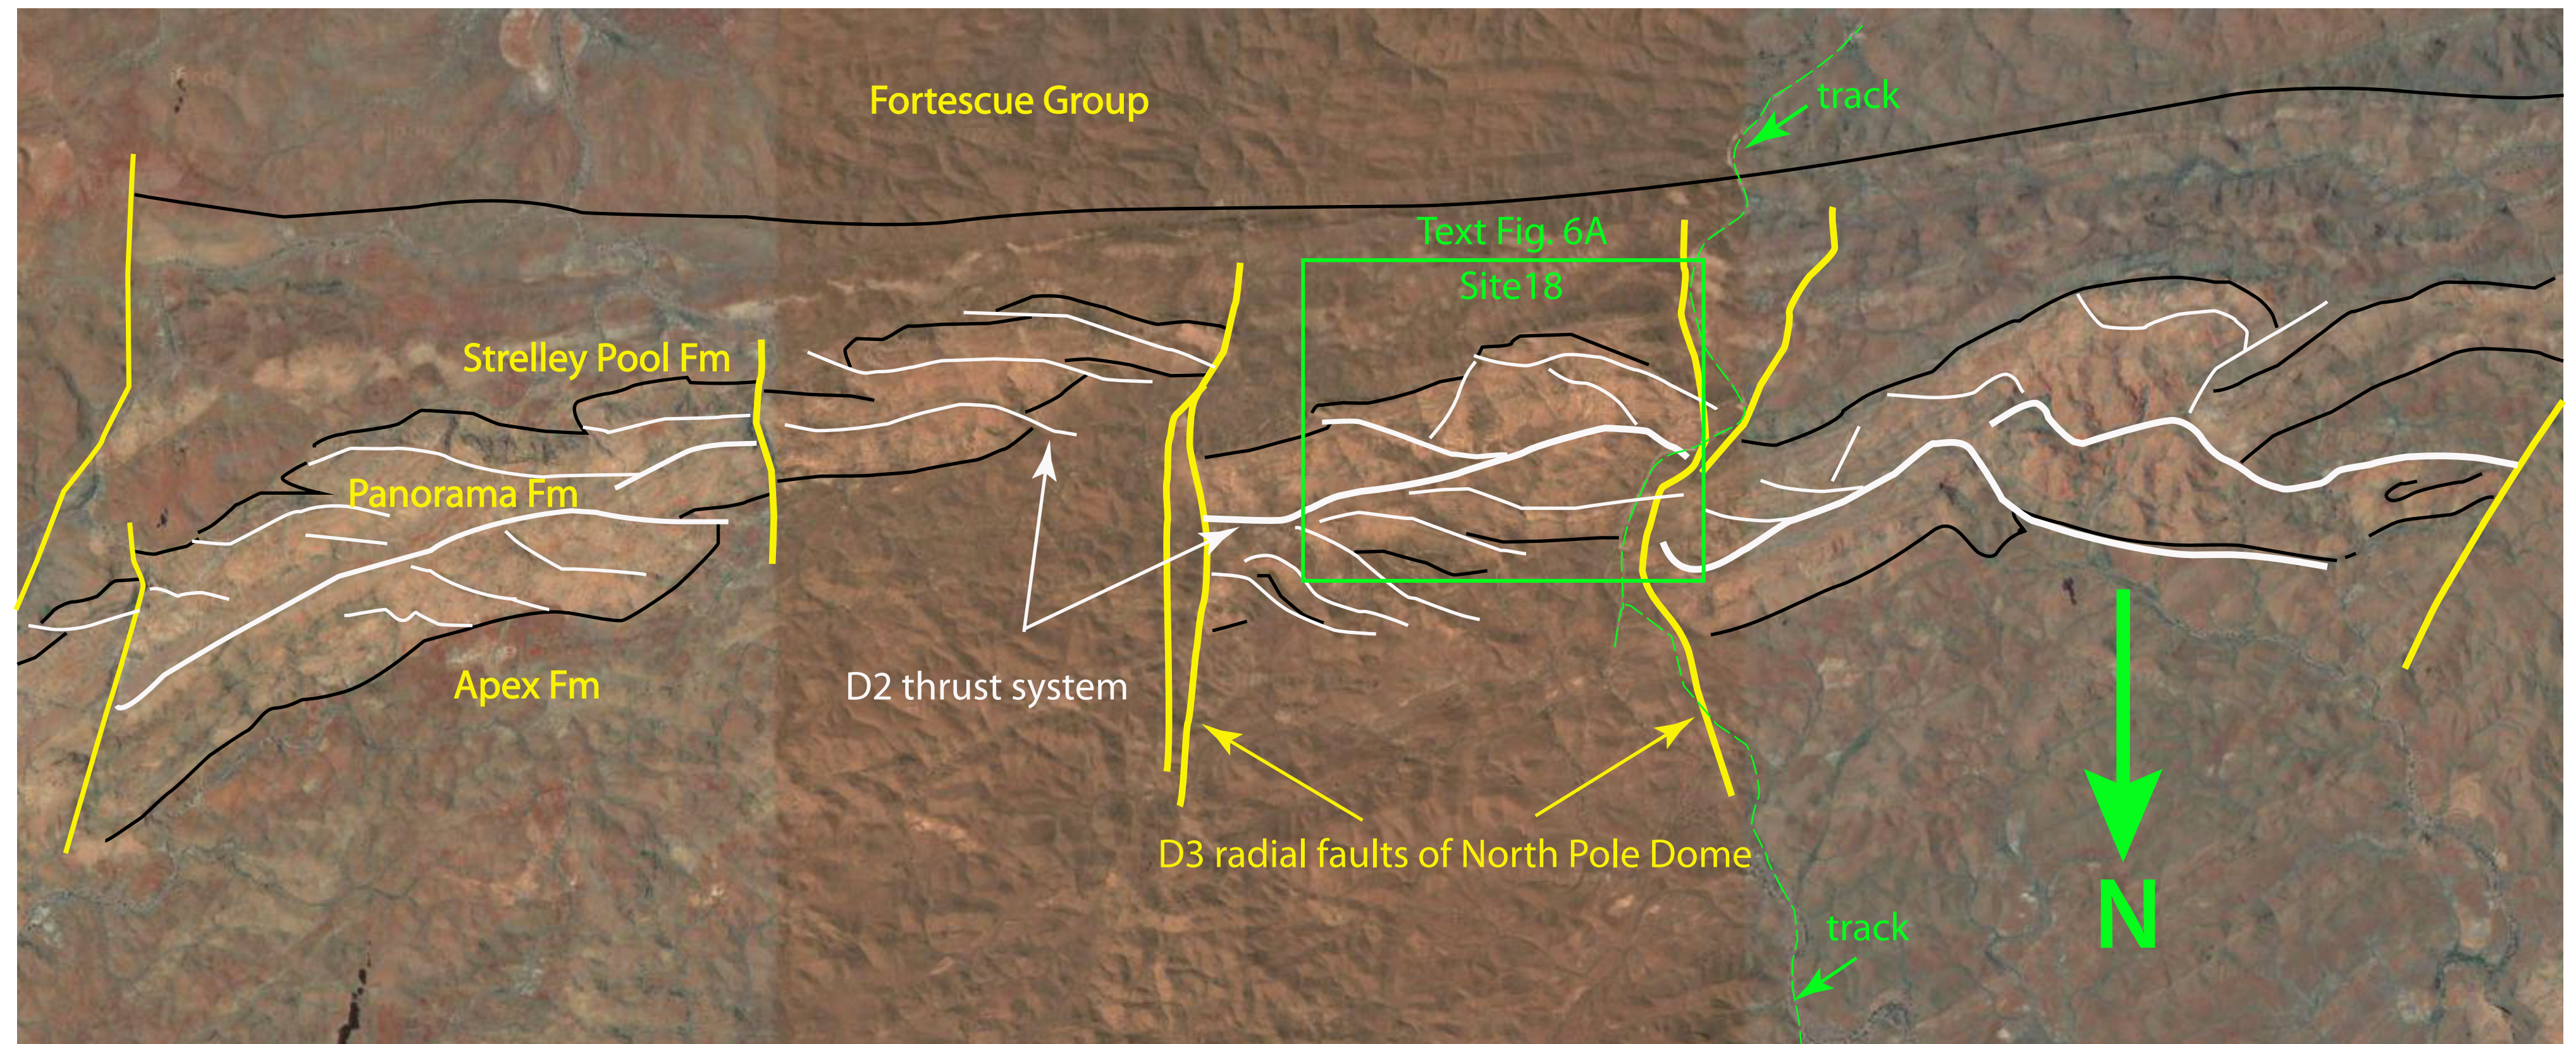

source: Google Earth, image © 2013 Digital Globe

## Supplementary figure f.

### Panorama Ridge, North Pole Dome South, site 18

NB the actual interdigitating boundary between Panorama Fm and Strelley Pool Fm starts a bit lower, in the top of the Panorama Fm, as can be seen in Text Fig. 6A, but in this interpretation has been drawn (in black) along the contrast between light (mainly felsic) and dark brown (mainly mafic) colours. Dip is c. 60° south.
